# Supplementary material
Source: PubMed Central journal article supplement (PMC11029663)

## Supplemental Figure Legends

**Supplemental Fig. 1 CD8 T cell responses induced by BiVax using three minimal peptide epitopes.** Mice (3 per group) were vaccinated i.v. on days 0 and 12 with BiVax composed of 100  $\mu\text{g}$  of indicated peptide and 50  $\mu\text{g}$  of Poly-IC, 7 days after each immunization the presence of antigen-specific CD8 T cells in blood was evaluated by tetramer analysis. Results represent the percentage of tetramer positive CD8 T cells for each mouse per group.

**Supplemental Fig. 2 Hydrophobicity and amphiphilicity analysis of CD8 T cell epitopes.** For illustration purposes amino acids were grouped into three categories (High, Intermediate and low) depending on the degree of hydrophobicity according to Kyte-Doolittle (KD) scale (18). Four CD8 T cell epitopes were analyzed for their overall hydrophobicity by the sum ( $\Sigma$ ) of the KD values for each residue. Peptides HPV16-E7<sub>49-57</sub> and Trp2<sub>180-188</sub> (which function in BiVax) were found to contain in each half a continuous segment of 4 or 5 mostly hydrophobic residues (framed in red) and a relatively hydrophilic portion on the other half, making them amphiphilic.

**Supplemental Fig. 3 Extending peptide using hydrophilic residues did not improve the immunogenicity of BiVax.** Mice (3 per group) were vaccinated i.v. on days 0 and 12 with BiVax composed of 150  $\mu\text{g}$  of peptide and 50  $\mu\text{g}$  of Poly-IC, 7 d post-booster administration, presence of antigen-specific CD8 T cells in blood was evaluated by tetramer analysis. Results represent the average percentage of tetramer positive CD8 T cells from 3 mice per group with SD (*bars*) of the means.

**Supplemental Fig. 4** Increasing peptide hydrophobicity of Ova<sub>257-264</sub> enhances immunogenicity of BiVax. **(A)** Mice (4 per group) received identical BiVax immunizations (prime/boost) with either minimal peptide (SIINFEKL) or palmitilated peptide (Pam2KMFVSIINFEKL). Immune responses were measured in blood 7 d after the prime and boost as noted.

# Supplemental Figure 1

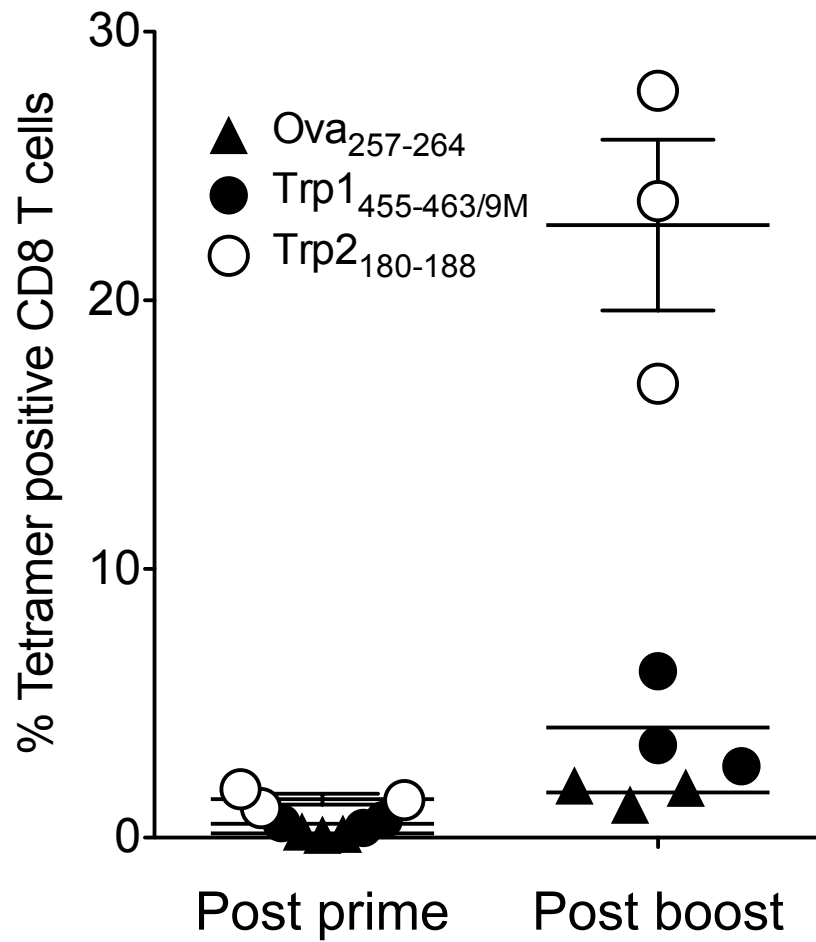

# Supplemental Figure 2

| AA | KD   | Hydrophobicity |
|----|------|----------------|
| I  | 4.5  | High           |
| V  | 4.2  |                |
| L  | 3.8  |                |
| F  | 2.8  |                |
| C  | 2.5  |                |
| M  | 1.9  | Intermediate   |
| A  | 1.8  |                |
| G  | -0.4 |                |
| T  | -0.7 |                |
| S  | -0.8 |                |
| W  | -0.9 |                |
| Y  | -1.3 |                |
| P  | -1.6 | Low            |
| H  | -3.2 |                |
| E  | -3.5 |                |
| Q  | -3.5 |                |
| D  | -3.5 |                |
| N  | -3.5 |                |
| K  | -3.9 |                |
| R  | -4.5 |                |

|                           | aa       | kd   |
|---------------------------|----------|------|
| HPV16-E7 <sub>49-57</sub> | R        | -4.5 |
|                           | A        | 1.8  |
|                           | H        | -3.2 |
|                           | Y        | -1.3 |
|                           | N        | -3.5 |
|                           | I        | 4.5  |
|                           | V        | 4.2  |
|                           | T        | -0.7 |
|                           | F        | 2.8  |
|                           | $\Sigma$ | 0.1  |

|                         | aa       | kd   |
|-------------------------|----------|------|
| Trp2 <sub>180-188</sub> | S        | -0.8 |
|                         | V        | 4.2  |
|                         | Y        | -1.3 |
|                         | D        | -3.5 |
|                         | F        | 2.8  |
|                         | F        | 2.8  |
|                         | V        | 4.2  |
|                         | W        | -0.9 |
|                         | L        | 3.8  |
|                         | $\Sigma$ | 11.3 |

|                        | aa       | kd   |
|------------------------|----------|------|
| Ova <sub>257-264</sub> | S        | -0.8 |
|                        | I        | 4.5  |
|                        | I        | 4.5  |
|                        | N        | -3.5 |
|                        | F        | 2.8  |
|                        | E        | -3.5 |
|                        | K        | -3.9 |
|                        | L        | 3.8  |
|                        | $\Sigma$ | 3.9  |

|                            | aa       | kd   |
|----------------------------|----------|------|
| Trp1 <sub>455-463/9M</sub> | T        | -0.7 |
|                            | A        | 1.8  |
|                            | P        | -1.6 |
|                            | D        | -3.5 |
|                            | N        | -3.5 |
|                            | L        | 3.8  |
|                            | G        | -0.4 |
|                            | Y        | -1.3 |
|                            | M        | 1.9  |
|                            | $\Sigma$ | -3.5 |

# Supplemental Figure 3

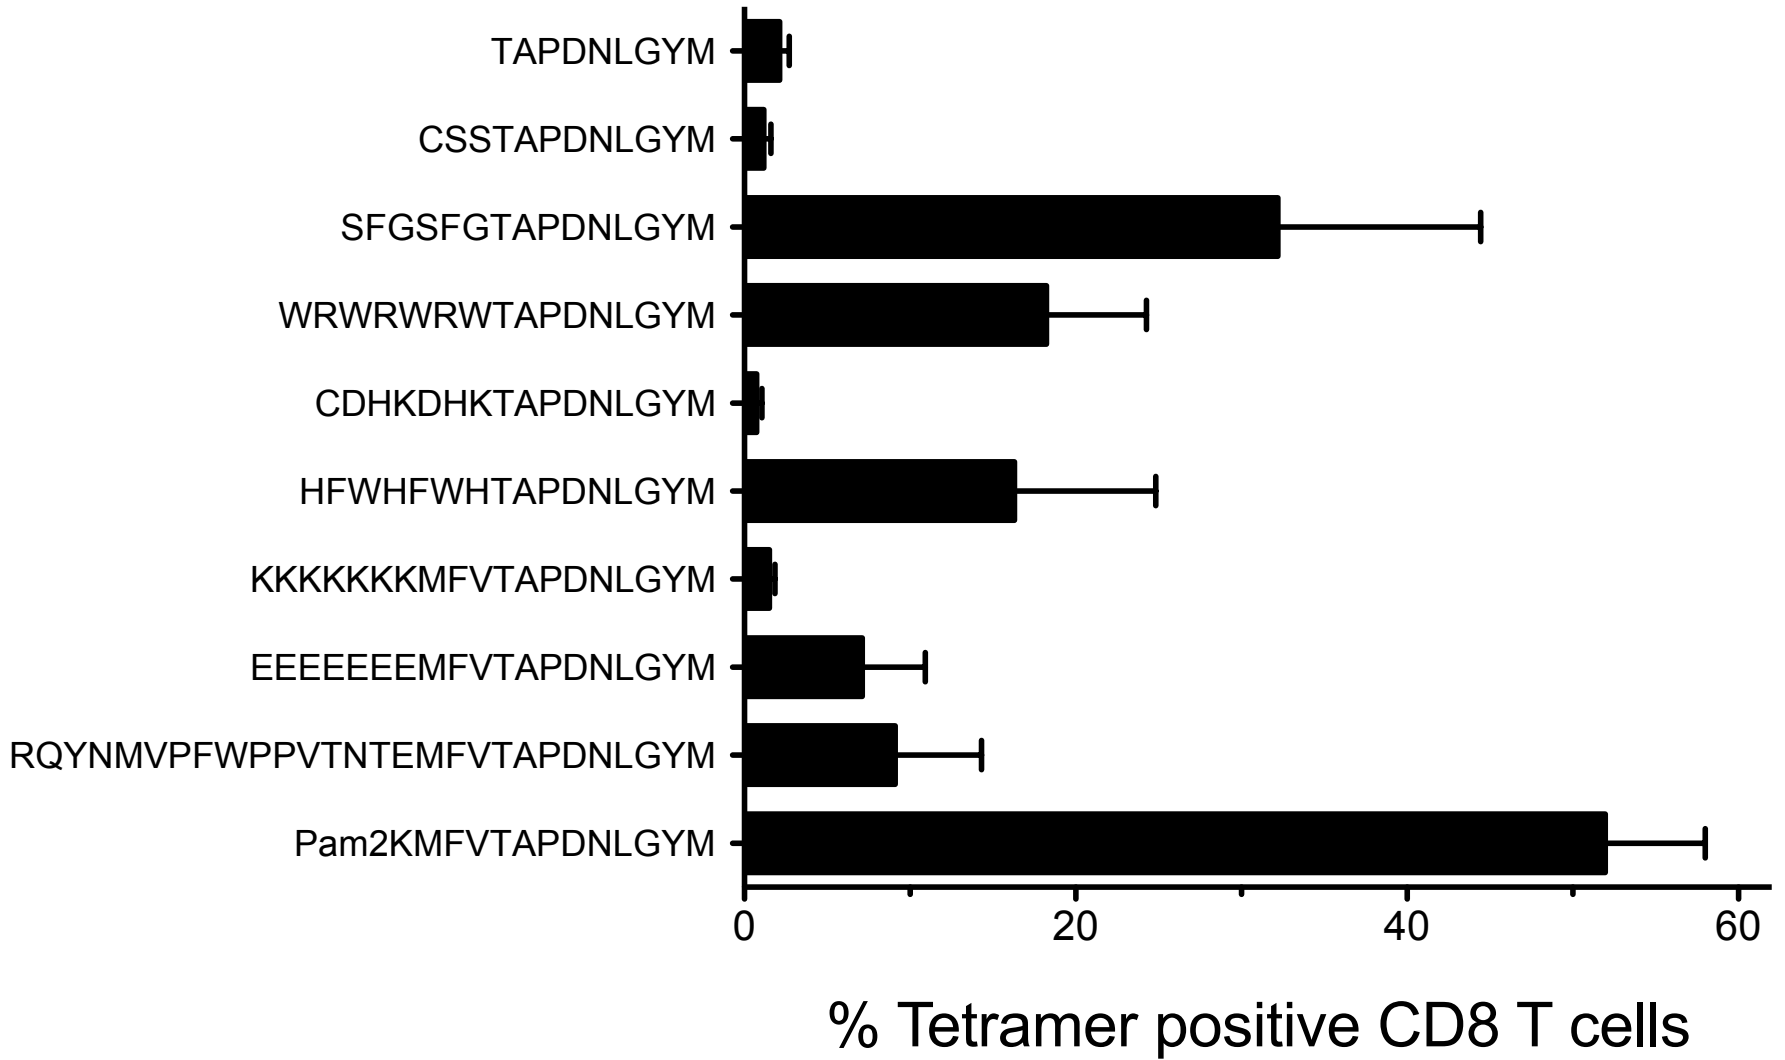

# Supplemental Figure 4

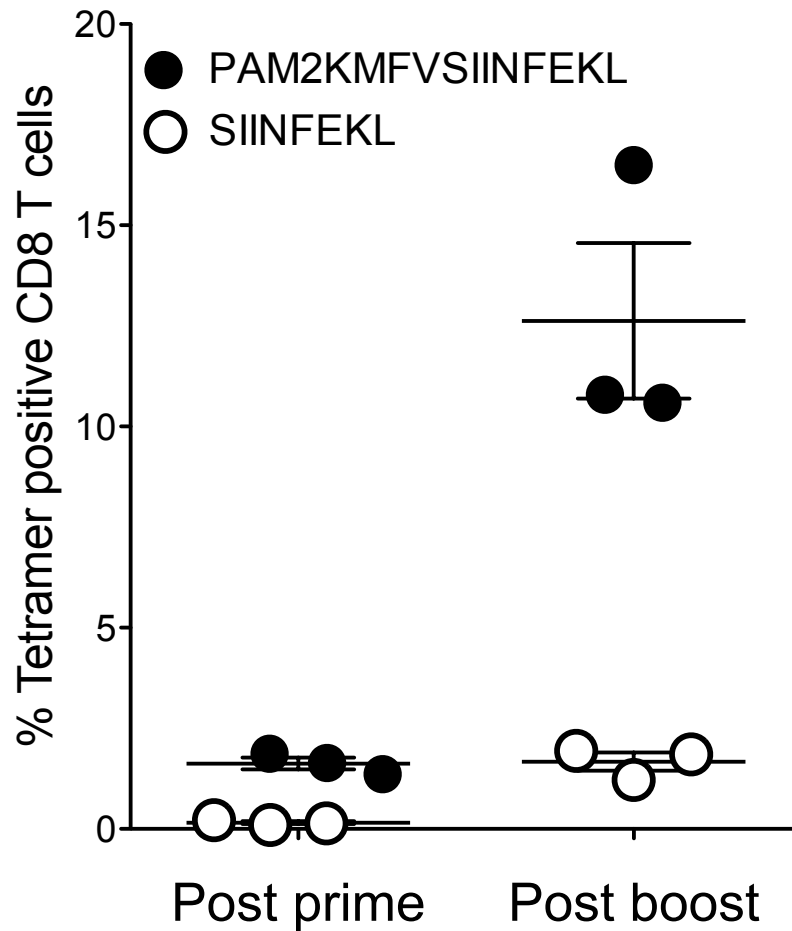

Supplement: 262_2012_1382_MOESM1_ESM.pdf [file 262_2012_1382_MOESM1_ESM.pdf]
